# Supplementary material
Source: publisher figshare collection journal article supplement (https://gsapubs.figshare.com/ndownloader/files/22397808)
Supplement: Supplementary file 1 [file 22397808]

Table XX: Location of samples

| **Location: UTM NAD 83 Zone 11** | | | |
| --- | --- | --- | --- |
| **Sample Number** | **Easting (m)** | **Northing (m)** |  |
| TR6 | 449136 | 4464082 |  |
| 15 Tct | 450514 | 4462923 |  |
| TR05-6 | 450438 | 4462917 |  |
| TR05-4 | 449473 | 4463942 |  |
| TR05-1 | 455550 | 4457602 |  |
| 12 Tfc | 452477 | 4461678 |  |
| TR95 | 452540 | 4462002 |  |
| TR52 | 450243 | 4465234 |  |
| TR05-27 | 451448 | 4464660 |  |
| TR05-21 | 450133 | 4467015 |  |
| TOD 42 | 453219 | 4461431 |  |
| TR05-26 | 451741 | 4465837 |  |
| TR9 | 450457 | 4463504 |  |
| TR53 | 451219 | 4464094 |  |
